# Supplementary material for: Ketamine Causes Mitochondrial Dysfunction in Human Induced Pluripotent Stem Cell-Derived Neurons
Source: PubMed Central journal article supplement (PMC4447382; doi:10.1371/journal.pone.0128445), 2015-05-28
Supplement: pone.0128445.s003.pdf [file pone.0128445.s003.pdf]

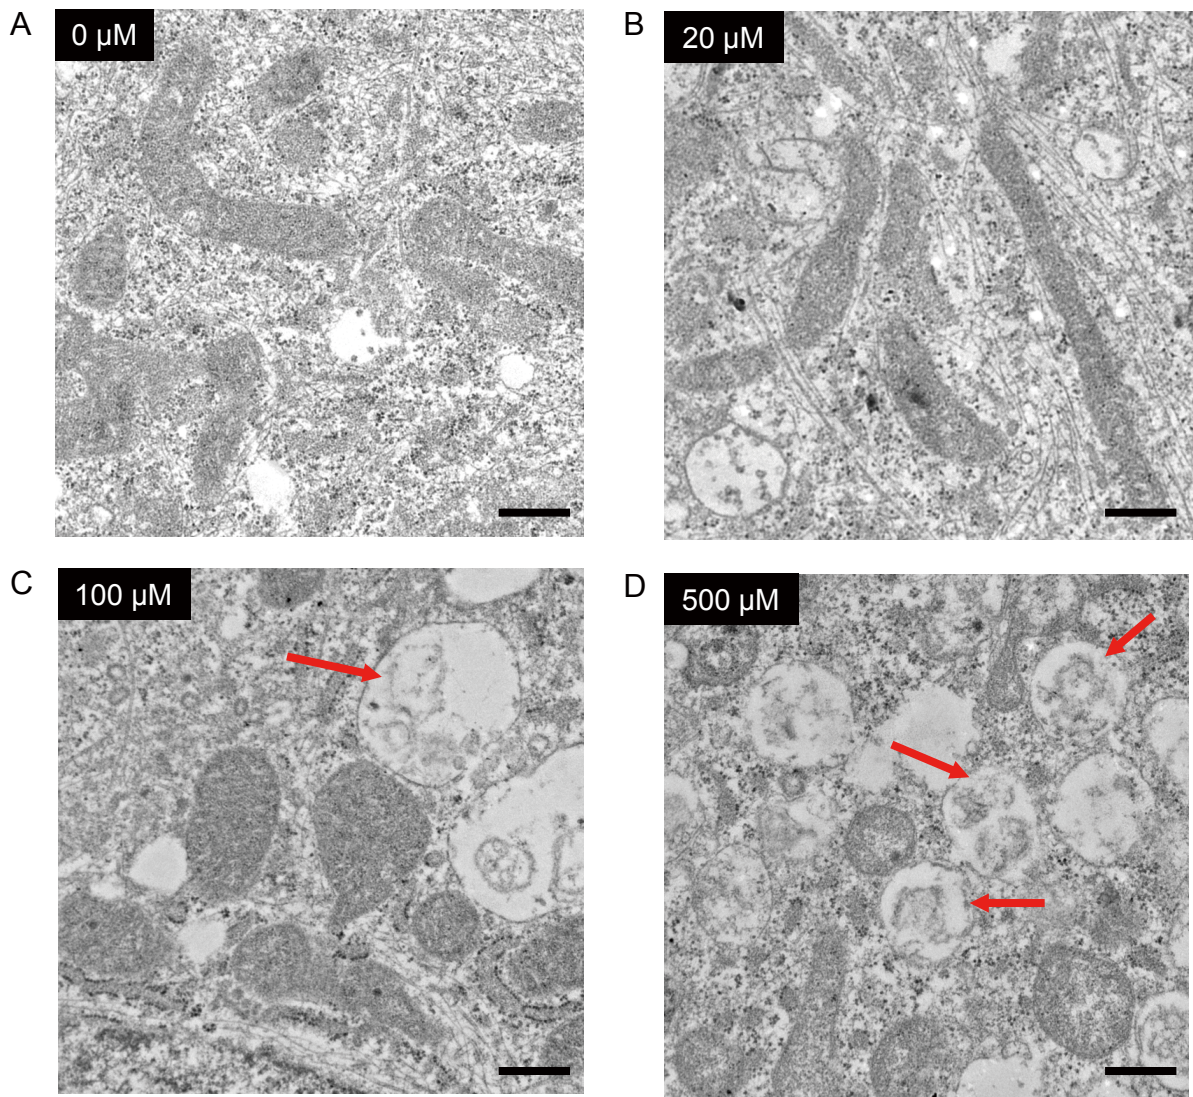

**S3 Fig. Representative transmission electron microscopy images of cortical neuronal cell line treated with ketamine.** Control neurons (A) and 20  $\mu\text{M}$  ketamine-treated neurons (B) had an abundance of elongated mitochondria with intact inner and outer membranes. (C) In the cells treated with 100  $\mu\text{M}$  of ketamine, the number of elongated mitochondria decreased, and there was indication of mitochondrial fragmentation. Autophagosomes (arrow) were observed in some neurons. (D) Cells treated with 500  $\mu\text{M}$  ketamine. The lengths of mitochondria were short and the number of autophagosomes increased. *Scale bar* = 500 nm.
